# Supplementary material for: Voluntary intake of psychoactive substances is regulated by the dopamine receptor Dop1R1 in Drosophila
Source: PubMed Central journal article supplement (PMC7873259; doi:10.1038/s41598-021-82813-0), 2021-02-09
Supplement: 41598_2021_82813_MOESM1_ESM.pdf [file 41598_2021_82813_MOESM1_ESM.pdf]

**Supplementary information for**

Voluntary intake of psychoactive substances is regulated by the dopamine receptor Dop1R1 in *Drosophila*

**Authors:** Mai Kanno <sup>1</sup>, Shun Hiramatsu <sup>1</sup>, Shu Kondo <sup>2</sup>, Hiromu Tanimoto <sup>1</sup>, Toshiharu Ichinose <sup>1,3,4,5,\*</sup>

1. Graduate School of Life Sciences, Tohoku University, Sendai, 980-8577, Japan
2. Invertebrate Genetics Laboratory, National Institute of Genetics, Mishima, 411-8540, Japan
3. Frontier Research Institute for Interdisciplinary Sciences, Tohoku University, Sendai, 980-8578, Japan
4. Center for Transdisciplinary Research, Niigata University, Niigata, 950-2181, Japan
5. Department of Neuropharmacology, Nagoya City University, Nagoya, 467-8603, Japan

**\*Correspondence to:**

Toshiharu Ichinose PhD

Frontier Research Institute for Interdisciplinary Sciences, Tohoku University

Email: toshiharu.ichinose.c1@tohoku.ac.jp

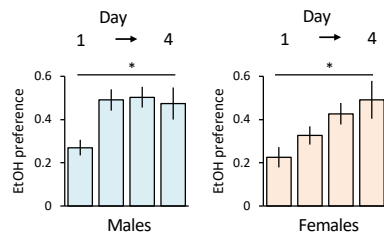

**Supplementary figure 1.** Both males and females acquire preference for ethanol. Groups of four wild-type male (left) or female (right) flies are given a choice between 5% sucrose and 5% sucrose supplemented with 15% ethanol, similar to figure 1, and daily preference is plotted. Male:  $P = 0.0075$ ,  $n = 15$  (Friedman test); female:  $F_{(1.939, 27.14)} = 5.174$ ,  $P = 0.0155$ ,  $n = 15$  (one-way ANOVA).
